# Supplementary material for: Suppression of Sn2+oxidation and formation of large-size crystal grains with multifunctional chloride salt for perovskite solar cell applications
Source: Royal Society of Chemistry journal article supplement (doi:10.1039/d2tc00992g), 2022-01-01
Supplement: d2tc00992g1.pdf [file d2tc00992g1.pdf]

## Supporting Information

### Suppression of Sn<sup>2+</sup> Oxidation and Formation of Large-Size Crystal Grains with Multifunctional Chloride Salt for Perovskite Solar Cell Applications

Minghao Wang,<sup>a</sup> Wei Wang,<sup>a</sup> Yifan Shen,<sup>a</sup> Kun Cao,<sup>a</sup> Junwen Chen,<sup>a</sup> Xiangqing Zhao,<sup>a</sup> Meng Xie<sup>a</sup> and Shufen Chen<sup>\*a</sup>

<sup>a</sup>State Key Laboratory of Organic Electronics and Information Displays & Institute of Advanced Materials (IAM), Nanjing University of Posts & Telecommunications, 9 Wenyuan Road, Nanjing 210023, China.

\*Corresponding author (email: iamsfchen@njupt.edu.cn)

#### Experimental Section

##### 1. Materials

Tin iodide (SnI<sub>2</sub>, 99.99%), tin fluoride (SnF<sub>2</sub>, 99%), 2,5-diaminohydroquinone dihydrochloride (C<sub>6</sub>H<sub>8</sub>N<sub>2</sub>O<sub>2</sub> · 2HCl, 97%), *N,N*-dimethylformamide (DMF, anhydrous, 99.8%), dimethyl sulfoxide (DMSO, anhydrous, 99.9%), chlorobenzene (CB, anhydrous, 99.8%), and bathocuproine (BCP, 99.9%). All above-mentioned chemicals were obtained from Sigma-Aldrich. Formamidinium iodide (FAI, 99.99%) and methylammonium iodide (MAI, 99.9%) were purchased from Xi'an Polymer Light Technology Corp. Poly(3,4-ethylenedioxythiophene):poly(styrenesulfonate) (PEDOT:PSS, PVP AI 4083) was purchased from Heraeus Materials Technology Co. Ltd. Buckminsterfullerene (C<sub>60</sub>, 99%) was purchased from Nano-C Tech. All chemicals were used as received without further purification.

##### 2. Preparation of perovskite solutions

The perovskite solutions were prepared in a glove box with both H<sub>2</sub>O and O<sub>2</sub> < 0.01 ppm, which were prepared by dissolving MAI (40 mg), FAI (129 mg), SnI<sub>2</sub> (373 mg) and SnF<sub>2</sub> (16 mg) in a mixed solvent of 800 μL DMF and 200 μL DMSO. Then the as-prepared solutions were stirred for three days. Before use, add *x* mol C<sub>6</sub>H<sub>8</sub>N<sub>2</sub>O<sub>2</sub> · 2HCl (*x* = 0.005, 0.01, and 0.015) to the precursor solutions, and continue stirring until they are dissolved. Finally, the solutions were filtered before use.

##### 3. Device Fabrication

Firstly, the ITO-coated glass substrates (17 mm × 17 mm) were ultrasonically rinsed with acetone, ethanol and deionized water in sequence. After blown with high purity N<sub>2</sub> and dried in a vacuum with an oven, the ITO substrates were treated with UV-ozone for 12 min. Then, The PEDOT:PSS aqueous solution was filtered with a 0.45 μm filter before use, and then it was spin-coated onto the patterned ITO glass substrates at 3000 rpm for 30 s, followed by a 120 °C thermal annealing for 30 min. Then perovskite precursor solution was spin-coated on the PEDOT:PSS-coated ITO substrates at 5000 rpm for 60 s, and 120 μL CB was used as the anti-solvent to treat the perovskite films at the 15th s. After the spin coating was completed, the perovskite film was placed on a 90 °C hot stage to treat for 15 minute. The above operations were all done in a glove box filled with N<sub>2</sub>. Finally, 40 nm C<sub>60</sub>, 9 nm of BCP and 100 nm of Ag were sequentially deposited by thermal evaporation under a high vacuum of >10<sup>-5</sup> Pa, forming a series of PSCs. The active area for all devices is 0.1 cm<sup>2</sup>.

#### 4. Device characterization

The scanning electron microscope (SEM) images of FA<sub>0.75</sub>MA<sub>0.25</sub>SnI<sub>3</sub> perovskite films were obtained by using a Hitachi S-4800 field emission scanning electron microscopy. The X-ray diffraction (XRD) patterns were carried out using a Bruker D8 ADVANCE XRD equipment. The steady-state photoluminescence (PL) was measured with a Hamamatsu C12132 fluorescence lifetime spectrometer at an excitation wavelength of 479 nm. The X-ray photoelectron spectroscopy (XPS) spectra of FA<sub>0.75</sub>MA<sub>0.25</sub>SnI<sub>3</sub> perovskite films on ITO glass substrate were carried out by using PHI Quantera SXM (ULVAC-PHI) in an ultrahigh-vacuum environment of 5×10<sup>-11</sup> Pa. The current density-voltage characteristics were carried out using Keithley 2400 under AM 1.5G illuminations (100 mW cm<sup>-2</sup>) from a solar simulator (Oriel Sol3A Class Solar Simulator (94023A)) in a glove box with N<sub>2</sub> atmosphere (H<sub>2</sub>O < 0.1 ppm and O<sub>2</sub> < 1 ppm). The incident photon to current efficiency (IPCE) spectra were carried out by QTest Station 500AD Solar Cell Quantum Efficiency System (CROWNTECH, INC). The ultraviolet photoelectron spectroscopy (UPS) was operated with a He discharged lamp (He I 21.22 eV, Kratos Axis Supra). The electrochemical impedance spectra (EIS) were studied with a CHI660 electrochemical workstation (CH Instrument Inc.), which were measured within a frequency range of 10<sup>5</sup>-1 Hz at 0.4 V under dark condition.

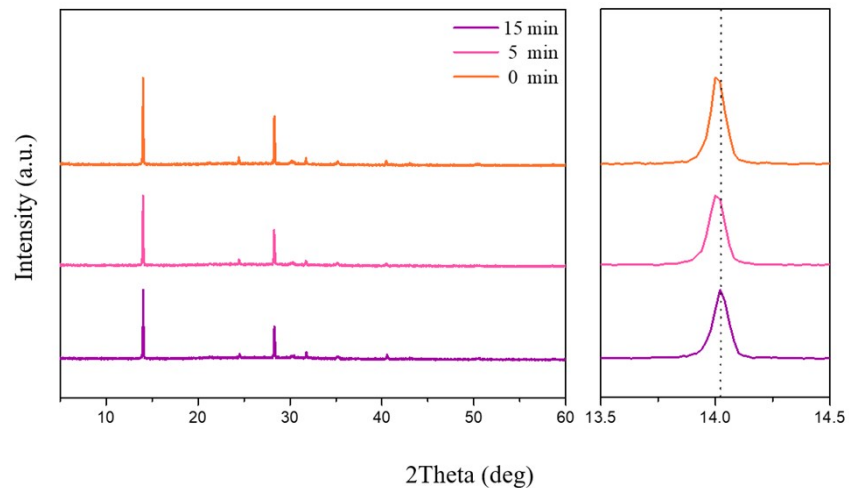

**Fig. S1.** XRD patterns for the precursor films annealed for 0 min, 5 mins and 15 mins.

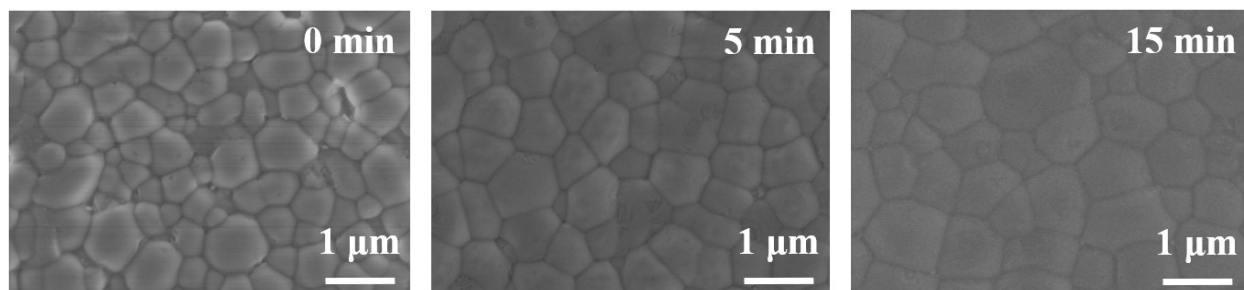

**Fig. S2.** SEM patterns for the  $\text{FA}_{0.75}\text{MA}_{0.25}\text{SnI}_3$  films annealed for 0 min, 5 mins and 15 mins.

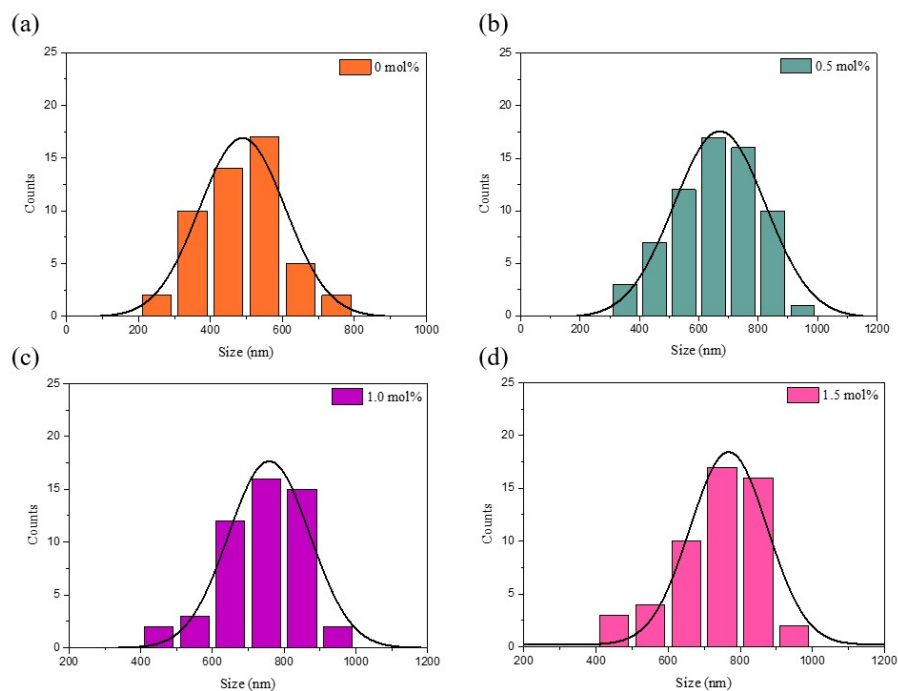

**Fig. S3.** Grain size statistics of the pristine perovskite and  $C_6H_8N_2O_2 \cdot 2HCl$ -incorporated perovskites with different doping concentration from top-view SEM images: (a) 0 mol%, 497 nm, (b) 0.5 mol%, 678 nm, (c) 1.0 mol%, 764 nm, (d) 1.5 mol%, 781 nm.

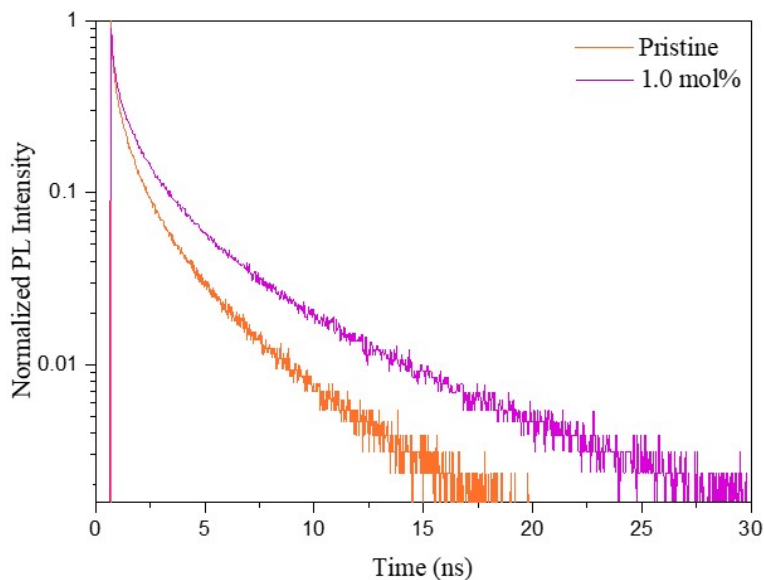

**Fig. S4.** Time-resolved PL spectra of pristine and 1.0 mol%  $C_6H_8N_2O_2 \cdot 2HCl$ -doped perovskites.

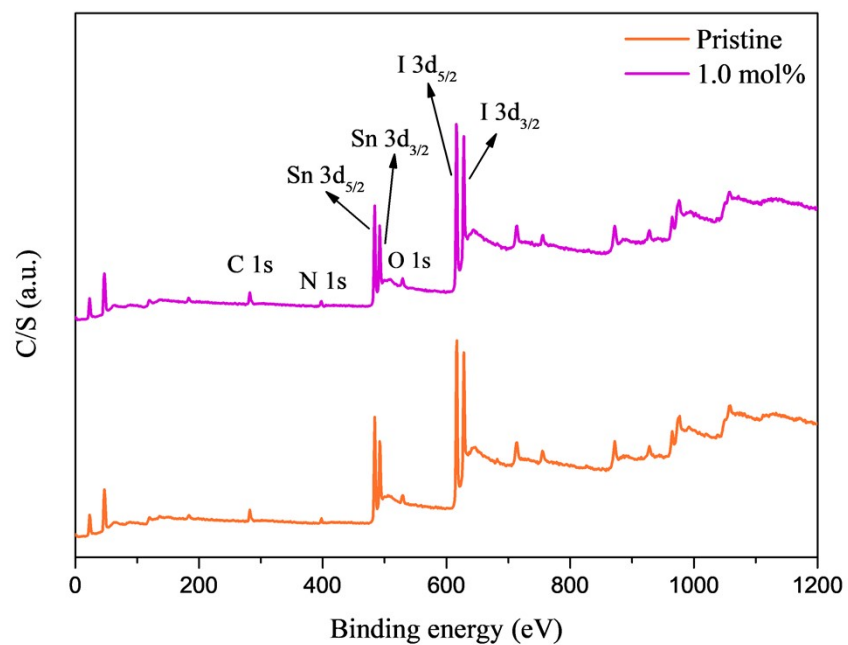

**Fig. S5.** XPS survey spectra obtained from control and  $C_6H_8N_2O_2 \cdot 2HCl$ -doped perovskite films.

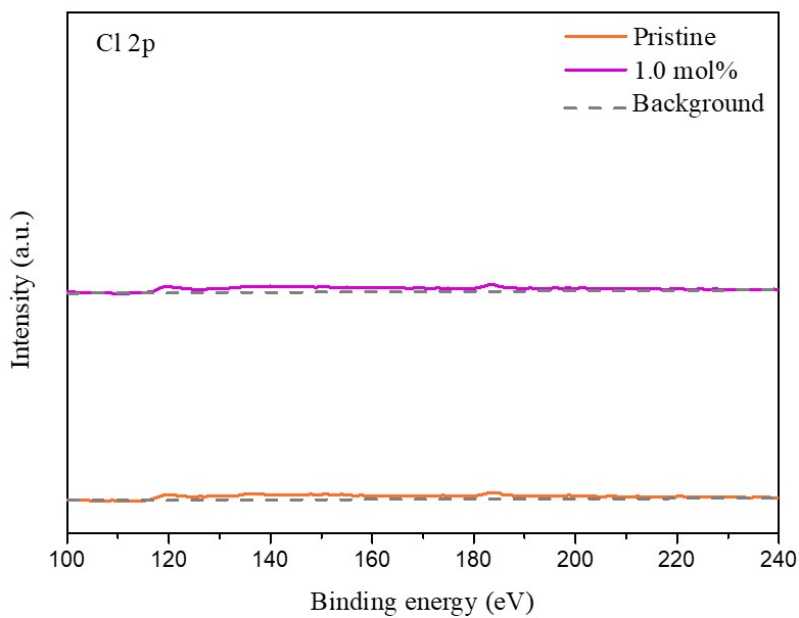

**Fig. S6.** The Cl 2p XPS spectra of  $C_6H_8N_2O_2 \cdot 2HCl$ -doped and control  $FA_{0.75}MA_{0.25}SnI_3$  films.

**Table S1.** Fitted photoluminescence lifetimes for pristine and 1.0 mol% C<sub>6</sub>H<sub>8</sub>N<sub>2</sub>O<sub>2</sub> · 2HCl -doped FA<sub>0.75</sub>MA<sub>0.25</sub>SnI<sub>3</sub> perovskite films with a bi-exponential decay model. Here, A<sub>1</sub> and A<sub>2</sub> are fractional intensities, and τ<sub>1</sub> and τ<sub>2</sub> are lifetimes. The average carrier lifetime was calculated with  $\tau_{\text{avr}} = A_1\tau_1 + A_2\tau_2$ .

| Sample                                                                         | τ <sub>1</sub> (ns)/A <sub>1</sub> (%) | τ <sub>2</sub> (ns)/A <sub>2</sub> (%) | χ <sup>2</sup> | τ <sub>avr</sub> (ns) |
|--------------------------------------------------------------------------------|----------------------------------------|----------------------------------------|----------------|-----------------------|
| Pristine                                                                       | 0.75/36.32                             | 5.59/63.68                             | 0.934          | 3.83                  |
| 1.0 mol%<br>C <sub>6</sub> H <sub>8</sub> N <sub>2</sub> O <sub>2</sub> · 2HCl | 0.92/32.46                             | 8.12/67.54                             | 1.027          | 5.77                  |
